# Supplementary material for: Exploring the cellular basis of human disease through a large-scale mapping of deleterious genes to cell types
Source: PubMed Central journal article supplement (PMC4557825; doi:10.1186/s13073-015-0212-9), 2015-09-01

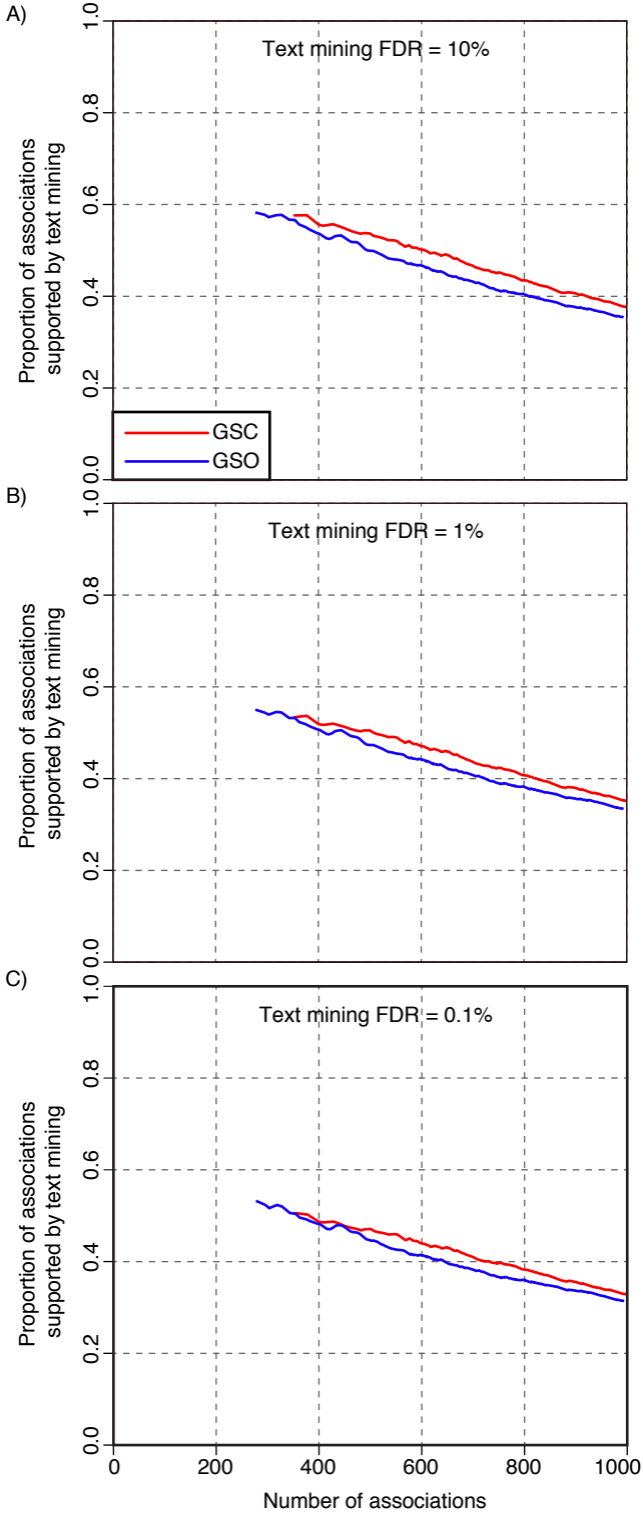

Supplement: 13073_2015_212_MOESM20_ESM.pdf [file 13073_2015_212_MOESM20_ESM.pdf]
